# Supplementary material for: What arguments and from whom are most influential in shaping public health policy: thematic content analysis of responses to a public consultation on the regulation of television food advertising to children in the UK
Source: PubMed Central journal article supplement (PMC6830459; doi:10.1136/bmjopen-2018-028221), 2019-09-23
Supplement: bmjopen-2018-028221supp002.pdf [file bmjopen-2018-028221supp002.pdf]

| <b>Advertising stakeholders</b>               | <b>Broadcast stakeholders</b>                   | <b>Lawyers</b>         | <b>Politicians</b>                             | <b>Retailers</b>            |
|-----------------------------------------------|-------------------------------------------------|------------------------|------------------------------------------------|-----------------------------|
| Institute of Practitioners in Advertising     | Producer's Alliance for Cinema and Television 1 | Baker and McKenzie LLP | Mary Creagh MP                                 | Sainsbury                   |
| Advertising Association                       | Five                                            |                        | Welsh Assembly                                 | The Co-operative            |
| Incorporated Society of British Advertisers 1 | Channel 4                                       |                        | All Party Parliamentary group on Heart Disease | British Retail Consortium 1 |
| Mediavest Manchester                          | Flextech television                             |                        | David Amess MP                                 | British Retail Consortium 2 |
| Zenith Optimedia                              | ITV                                             |                        |                                                |                             |
| Mindshare                                     | GMTV                                            |                        |                                                |                             |
| Incorporated Society of British Advertisers 2 | Jetix, Nickelodeon and Turner                   |                        |                                                |                             |
|                                               | Producer's Alliance for Cinema and Television 2 |                        |                                                |                             |
|                                               | Broadcast Advertising Clearance Centre          |                        |                                                |                             |
|                                               | British Academy of Film and Television Arts     |                        |                                                |                             |
|                                               | Broadcast Committee of Advertising Practice     |                        |                                                |                             |
