# Supplementary material for: What arguments and from whom are most influential in shaping public health policy: thematic content analysis of responses to a public consultation on the regulation of television food advertising to children in the UK
Source: PubMed Central journal article supplement (PMC6830459; doi:10.1136/bmjopen-2018-028221), 2019-09-23
Supplement: bmjopen-2018-028221supp003.pdf [file bmjopen-2018-028221supp003.pdf]

| Food companies       | Food industry representative groups                | Civil society groups                        | Public health stakeholders                                                          |
|----------------------|----------------------------------------------------|---------------------------------------------|-------------------------------------------------------------------------------------|
| Kellogg 1            | Food Advertising Unit 1                            | Kids Inc                                    | National Heart Forum 1                                                              |
| Kraft 1              | Food and Drink Federation 2                        | Consumer Council of Northern Ireland        | Northern Ireland Chest Heart and Stroke 2                                           |
| Pepsico              | Snack Nut and Crisp Manufacturers Association 1    | Children's Food Bill Coalition              | UK Public Health Association                                                        |
| GlaxoSmithKline 1    | Food Advertising Unit 2                            | National Consumer Council 1                 | Royal Society of Health                                                             |
| United Biscuits      | Food and Drink Federation 1                        | Which 1                                     | Consensus Action on Salt and Health                                                 |
| Nestle               | Dairy Council                                      | Officer of the Children's Commissioner      | Nutrition Society                                                                   |
| Cadbury              | Snack Nut and Crisp Manufacturers Association 2    | School Food Trust 1                         | Diabetes UK                                                                         |
| Ferrero 1            | Provision Trade Federation                         | Trading Standards Institute                 | Association for the Study of Obesity                                                |
| Masterfoods 2        | British Cheese Board                               | Which 2                                     | Heart of Mersey 2                                                                   |
| Coca-cola 1          | Biscuit Cake Chocolate Confectionary Association 1 | Welsh Consumer Council                      | National Oral Health Promotion Group                                                |
| McDonalds 2          | Biscuit Cake Chocolate Confectionary Association 2 | Food Aware                                  | Scientific Advisory Committee on Nutrition                                          |
| Vimto                | Dairy UK                                           | Safefood Ireland                            | British Psychological Society                                                       |
| Wrigley              |                                                    | The Caroline Walker Trust                   | British Dietetic Association                                                        |
| Wiltshire farm foods |                                                    | Advisory Committee for England              | National Heart Forum 2                                                              |
| Unilever             |                                                    | Voice of the Listener and Viewer 2          | British Heart Foundation                                                            |
| GlaxoSmithKline 2    |                                                    | Advertising Advisory Committess             | British Medical Association 1                                                       |
| Coca-cola 2          |                                                    | British Nutrition Foundation                | Cheshire and Merseyside Public Health Network                                       |
| Masterfoods 2        |                                                    | Food Ethics Council                         | Health Protection Agency Northern Ireland                                           |
| Kraft 2              |                                                    | Voice of the Listener and the Viewer 1      | Irish Heart Foundation 1                                                            |
| McDonalds 1          |                                                    | National Consumer Council 2                 | National Heart Alliance Ireland 1                                                   |
| RHM Group            |                                                    | National Family and Parenting Institute     | National Heart Alliance Ireland 2                                                   |
| Kellogg 2            |                                                    | National Union of Teachers                  | International Association for the Study of Obesity 1                                |
| Ferrero 2            |                                                    | The Nutrition Society                       | British Medical Association 2                                                       |
|                      |                                                    | Children's Food Campaign                    | Heart of Mersey 1                                                                   |
|                      |                                                    | Consumer Council                            | Northern Ireland Chest Heart and Stroke 1                                           |
|                      |                                                    | Barnardos                                   | Irish Heart Foundation 2                                                            |
|                      |                                                    | National Children's Bureau                  | NHS Borders                                                                         |
|                      |                                                    | Public Voice                                | Medical Research Council 1                                                          |
|                      |                                                    | School Food Trust                           | British Heart Foundation 2                                                          |
|                      |                                                    | Scotland's Commissioner for Young People    | Cancer Research UK                                                                  |
|                      |                                                    | Food Standards Agency                       | Northern Ireland Chest Heart and Stroke 3                                           |
|                      |                                                    | National Youth Agency                       | International Association for the Study of Obesity 2                                |
|                      |                                                    | Advisory Committee for Northern Ireland     | Royal College of Physicians                                                         |
|                      |                                                    | Food Commission 1                           | Weight Concern                                                                      |
|                      |                                                    | Women's Institute 1                         | British Dental Association                                                          |
|                      |                                                    | The Food Commission                         | Medical Research Council 2                                                          |
|                      |                                                    | The Obesity Awareness and Solutions Trust   | Joint statement by the British Heart Foundation, Cancer Research UK and Diabetes UK |
|                      |                                                    | National Federation of Women's Institutes 1 | Royal College of Nursing                                                            |
|                      |                                                    | National Federation of Women's Institutes 2 |                                                                                     |
